# Supplementary material for: Comparison between the persistence of post COVID-19 symptoms on critical patients requiring invasive mechanical ventilation and non-critical patients
Source: PubMed Central journal article supplement (PMC9394845; doi:10.1371/journal.pone.0273041), 2022-08-22

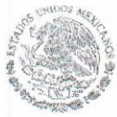

**SALUD**  
SECRETARÍA DE SALUD

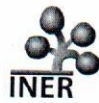

INSTITUTO NACIONAL  
DE ENFERMEDADES  
RESPIRATORIAS  
ISMAEL COSÍO VILLEGAS

Comité de Investigación  
19 CI 09 012 013  
Comité de Ética en Investigación  
CONBIOÉTICA-09CEI-003-20160427

Ciudad de México a 27 de mayo de 2021  
INER/CI/160/2021  
INER/CEI/168/2021

Dr. Miguel Ángel Salazar Lezama  
Investigador Principal

Asunto: **DICTAMEN APROBACIÓN.**

Título del Proyecto: ESPECTRO CLÍNICO DEL COVID-19 POSAGUDO EN PACIENTES DESPUÉS DE LA HOSPITALIZACIÓN: ESTUDIO DE COHORTE.

Código asignado por el Comité: **C22-21**

Le informamos que su proyecto de referencia ha sido evaluado por el Comité y las opiniones acerca de los documentos presentados se encuentran a continuación:

|           | No. y/o Fecha Versión | Decisión |
|-----------|-----------------------|----------|
| Protocolo | Versión 1, mayo 2021  | APROBADO |

Este protocolo tiene vigencia de mayo 2021 a mayo 2022.

En caso de requerir una ampliación, le rogamos tenga en cuenta que deberá enviar al Comité un reporte de progreso al menos 30 días antes de la fecha de término de su vigencia. El Comité dispone en su página electrónica de un formato estándar que podrá usarse al efecto. Lo anterior forma parte de las Consideraciones mínimas para el desarrollo del Proyecto de Investigación las cuales vienen descritas al reverso de esta hoja.

Dra. Blanca Margarita Bazán Perkins  
Presidente del Comité de Investigación

Atentamente

Dra. Patricia Borozica Rosete  
Secretaria del Comité de Ética en Investigación

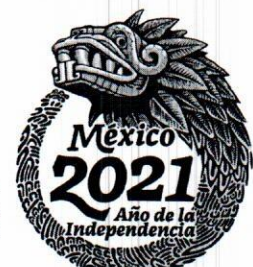

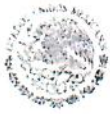

**SALUD**  
SECRETARÍA DE SALUD

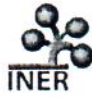

INSTITUTO NACIONAL  
DE ENFERMEDADES  
RESPIRATORIAS  
ISMAEL COSÍO VILLEGAS

Ciudad de México a 04 de mayo del 2021.

**Asunto: Solicitud Carta de dispensa del consentimiento informado.**

**Lic. Adriana Espinosa Jove**  
**Presidente del Comité de Ética en Investigación**  
**Presente.**

Solicito la dispensa de consentimiento informado para la realización del protocolo de investigación **"Espectro clínico del COVID-19 posagudo en pacientes después de la hospitalización: Estudio de cohorte."** Lo anterior con base en lo establecido en la Declaración de Helsinki, Fortaleza Brasil 2013, en donde se estipula que, *"para la investigación médica en que se utilice material o datos humanos identificables, como la investigación sobre material o datos contenidos en biobancos o depósitos similares, el responsable del proyecto debe pedir el consentimiento informado para la recolección, almacenamiento y reutilización. Podrá haber situaciones excepcionales en las que será imposible o impracticable obtener el consentimiento para dicha investigación. En esta situación, la investigación sólo puede ser realizada después de ser considerada y aprobada por un comité de ética en investigación"*.

El protocolo arriba mencionado es un estudio retrospectivo, se recabarán datos del expediente clínico y la información se mantendrá confidencial a través del uso de códigos alfanuméricos, posteriormente será reportada a nivel grupal. Por motivos de contingencia a los pacientes se les realizará únicamente un cuestionario vía telefónica, motivo por el cual se solicita la presente. Agradezco de antemano las facilidades que se otorguen para la realización de este proyecto.

**Atentamente:**



**Dr. Miguel Ángel Salazar Lezama**  
Investigador responsable

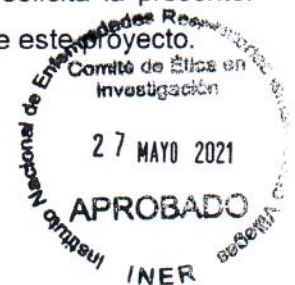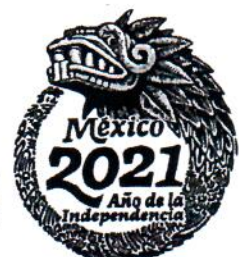

Supplement: pone.0273041.s001.pdf [file pone.0273041.s001.pdf]
