# Supplementary material for: Comparison between the persistence of post COVID-19 symptoms on critical patients requiring invasive mechanical ventilation and non-critical patients
Source: PubMed Central journal article supplement (PMC9394845; doi:10.1371/journal.pone.0273041), 2022-08-22
Supplement: pone.0273041.s002.pdf [file pone.0273041.s002.pdf]

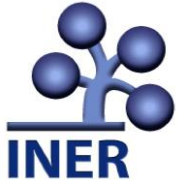

INSTITUTO NACIONAL DE ENFERMEDADES RESPIRATORIAS

ISMAEL COSÍO VILLEGAS

DIRECCIÓN MÉDICA

SUBDIRECCIÓN DE ATENCIÓN MÉDICA NEUMOLÓGICA

OFICINA DE ADMISIÓN HOSPITALARIA Y REGISTROS MÉDICOS

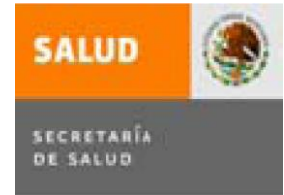

|                              |                                   |                |                                              |
|------------------------------|-----------------------------------|----------------|----------------------------------------------|
| Name of patient:             |                                   | Age:           |                                              |
| Symptom onset date:          | Hospital admission date:          |                |                                              |
| Intubation:                  | Duration:                         |                |                                              |
| Tracheostomy:                | Decanulation:                     |                |                                              |
| Gastrostomy:                 | Oxygen saturation upon admission: |                |                                              |
| Duration of hospitalization: | Post COVID 19 follow-up:          |                |                                              |
| Comorbidities:               | Diabetes                          |                | Chronic Obstructive Pulmonary Disease (COPD) |
|                              | Hypertension                      |                | Asthma                                       |
|                              | Dyslipidemia                      |                | Obstructive Sleep Apnea Syndrome (OSAS)      |
|                              | Obesity I                         |                | Pulmonary fibrosis                           |
|                              | Obesity II                        |                | Deep vein thrombosis                         |
|                              | Obesity III                       |                | Benign Prostatic Hyperplasia (BPH)           |
|                              | Hypothyroidism                    |                | Ischemic Heart Disease                       |
|                              | Glaucoma                          |                | Renal Insufficiency                          |
| Risk factors:                | Smoking:                          | Smoking Index: |                                              |

From the following signs and symptoms, select with an **X** those that you have presented during the infectious period and after your discharge for COVID 19.

**SIGNS AND SYMPTOMS DURING COVID-19**

**POST-COVID 19 SIGNS AND SYMPTOMS**

|  |                              |
|--|------------------------------|
|  | Dyspnea                      |
|  | Cough                        |
|  | Tracheal Stenosis            |
|  | Chest pain                   |
|  | Wheezing                     |
|  | Palpitations                 |
|  | Tachycardia                  |
|  | heart murmurs                |
|  | Pericarditis                 |
|  | Lower limb edema             |
|  | Elevated blood pressure      |
|  | Fatigue                      |
|  | Fever                        |
|  | Cognitive impairments        |
|  | Headache                     |
|  | Cold sensitivity             |
|  | Sleep-wake disorders         |
|  | Paresthesias/neuralgia       |
|  | Lack of sensation            |
|  | Vertigo                      |
|  | Dizziness                    |
|  | Delirium                     |
|  | Mobility limitations         |
|  | Asthenia                     |
|  | Adynamia                     |
|  | Abdominal pain               |
|  | Nausea                       |
|  | Diarrhea                     |
|  | Constipation                 |
|  | Lack of appetite             |
|  | Arthralgias                  |
|  | Myalgia                      |
|  | Depression                   |
|  | Anxiety                      |
|  | Tinnitus                     |
|  | Earache                      |
|  | Odynophagia                  |
|  | Hearing loss                 |
|  | Dysgeusia                    |
|  | Anosmia                      |
|  | hyposmia                     |
|  | Dysosmia                     |
|  | Rhinorrea                    |
|  | Sweat                        |
|  | Skin rash                    |
|  | Hair loss                    |
|  | Pressure ulcers              |
|  | Muscular weakness            |
|  | Tremor                       |
|  | Abnormalities of vocal cords |

|  |                              |
|--|------------------------------|
|  | Dyspnea                      |
|  | Cough                        |
|  | Tracheal Stenosis            |
|  | Chest pain                   |
|  | Wheezing                     |
|  | Palpitations                 |
|  | Tachycardia                  |
|  | heart murmur                 |
|  | Pericarditis                 |
|  | Lower limb edema             |
|  | Elevated blood pressure      |
|  | Fatigue                      |
|  | Fever                        |
|  | Cognitive impairments        |
|  | Headache                     |
|  | Cold sensitivity             |
|  | Sleep-wake disorders         |
|  | Paresthesias/neuralgia       |
|  | Lack of sensation            |
|  | Vertigo                      |
|  | Dizziness                    |
|  | Delirium                     |
|  | Mobility limitations         |
|  | Asthenia                     |
|  | Adynamia                     |
|  | Abdominal pain               |
|  | Nausea                       |
|  | Diarrhea                     |
|  | Constipation                 |
|  | Lack of appetite             |
|  | Arthralgias                  |
|  | Myalgia                      |
|  | Depression                   |
|  | Anxiety                      |
|  | Tinnitus                     |
|  | Earache                      |
|  | Odynophagia                  |
|  | Hearing loss                 |
|  | Dysgeusia                    |
|  | Anosmia                      |
|  | hyposmia                     |
|  | Dysosmia                     |
|  | Rhinorrea                    |
|  | Sweat                        |
|  | Skin rash                    |
|  | Hair loss                    |
|  | Pressure ulcers              |
|  | Muscular weakness            |
|  | Tremor                       |
|  | Abnormalities of vocal cords |
